# Supplementary material
Source: publisher site journal article supplement (https://www.dovepress.com/get_supplementary_file.php?f=456390.docx)
Supplement: Supplementary file 1 [file get_supplementary_file.php]

**Supplementary Table 1. Clinical variables deemed relevant for COPD diagnosis according to expert consensus.**

| **No.** | **Variable** |
| --- | --- |
| 1 | Age |
| 2 | Sex |
| 3 | Occupation |
| 4 | Smoker/Ex-smoker |
| 5 | Age at which began smoking |
| 6 | Number of daily cigarettes |
| 7 | Age at which stopped smoking |
| 8 | Pack year |
| 9 | Passive smoker |
| 10 | Number of daily cigarettes of another smoker |
| 11 | Wood smoke exposure |
| 12 | Years of wood smoke exposure |
| 13 | Daily hours of wood smoke exposure |
| 14 | Previous diagnosis of COPD, chronic bronchitis, or emphysema |
| 15 | Previous diagnosis of asthma, asthmatic, or allergic bronchitis |
| 16 | Previous spirometry |
| 17 | Presence of respiratory symptoms |
| 18 | Age at which the respiratory symptoms began |
| 19 | History of atopy |
| 20 | Presence of wheezing |
| 21 | Frequency of wheezing |
| 22 | Presence of dyspnoea |
| 23 | Frequency of dyspnoea during physical activity |
| 24 | Presence of chronic cough |
| 25 | Chronic cough in the mornings |
| 26 | Chronic expectoration |

**Supplementary Table 2.1. Full diagnostic performance of K-means Clustering in training sample**

| **Model** | **Accuracy** | **Sensitivity** | **Specificity** | **PPV** | **NPV** |
| --- | --- | --- | --- | --- | --- |
| Quadratic polynomial – PreBD | 0.755 | 0.886 | 0.684 | 0.604 | 0.917 |
| Quadratic polynomial – PostBD | 0.718 | 0.877 | 0.632 | 0.564 | 0.905 |
| Quadratic polynomial – All | 0.744 | 0.868 | 0.677 | 0.593 | 0.904 |
| Cubic polynomial – PreBD | 0.506 | 0.423 | 0.551 | 0.338 | 0.637 |
| Cubic polynomial – PostBD | 0.573 | 0.627 | 0.543 | 0.427 | 0.728 |
| Cubic polynomial – All | 0.558 | 0.605 | 0.533 | 0.413 | 0.713 |
| 1-term exponential – PreBD | 0.646 | 0 | 0.998 | 0 | 0.647 |
| 1-term exponential – PostBD | 0.646 | 0 | 0.998 | 0 | 0.647 |
| 1-term exponential – All | 0.646 | 0 | 0.998 | 0 | 0.647 |
| 2-term exponential – PreBD | 0.632 | 0.005 | 0.973 | 0.083 | 0.643 |
| 2-term exponential – PostBD | 0.646 | 0 | 0.998 | 0 | 0.647 |
| 2-term exponential – All | 0.646 | 0 | 0.998 | 0 | 0.647 |

PPV: Positive Predictive Value

NPV: Negative Predictive Value

PreBD: Prebronchodilator

PostBD: Postbronchodilator

Highlighted is the highest accuracy system.

**Supplementary Table 2.2. Full diagnostic performance of Hierarchical Clustering in training sample**

| **Model** | **Accuracy** | **Sensitivity** | **Specificity** | **PPV** | **NPV** |
| --- | --- | --- | --- | --- | --- |
| Quadratic polynomial – PreBD | 0.832 | 0.795 | 0.852 | 0.745 | 0.885 |
| Quadratic polynomial – PostBD | 0.594 | 0.968 | 0.39 | 0.463 | 0.958 |
| Quadratic polynomial – All | 0.814 | 0.6 | 0.931 | 0.825 | 0.811 |
| Cubic polynomial – PreBD | 0.626 | 0.941 | 0.454 | 0.484 | 0.934 |
| Cubic polynomial – PostBD | 0.51 | 0.341 | 0.602 | 0.318 | 0.627 |
| Cubic polynomial – All | 0.56 | 0.123 | 0.798 | 0.248 | 0.626 |
| 1-term exponential – PreBD | 0.589 | 0.955 | 0.39 | 0.46 | 0.94 |
| 1-term exponential – PostBD | 0.509 | 0.986 | 0.249 | 0.417 | 0.971 |
| 1-term exponential – All | 0.536 | 0.982 | 0.294 | 0.43 | 0.967 |
| 2-term exponential – PreBD | 0.629 | 0.005 | 0.968 | 0.071 | 0.642 |
| 2-term exponential – PostBD | 0.646 | 0 | 0.998 | 0 | 0.647 |
| 2-term exponential – All | 0.646 | 0 | 0.998 | 0 | 0.647 |

PPV: Positive Predictive Value

NPV: Negative Predictive Value

PreBD: Prebronchodilator

PostBD: Postbronchodilator

Highlighted is the highest accuracy system.

**Supplementary Table 2.3. Full diagnostic performance of Decision Trees in training sample**

| **Model** | **Accuracy** | **Sensitivity** | **Specificity** | **PPV** | **NPV** |
| --- | --- | --- | --- | --- | --- |
| Quadratic polynomial – PreBD | 0.821 | 0.559 | 0.963 | 0.891 | 0.801 |
| Quadratic polynomial – PostBD | 0.806 | 0.677 | 0.877 | 0.749 | 0.833 |
| Quadratic polynomial – All | 0.827 | 0.759 | 0.864 | 0.752 | 0.868 |
| Cubic polynomial – PreBD | 0.848 | 0.673 | 0.943 | 0.865 | 0.841 |
| Cubic polynomial – PostBD | 0.848 | 0.791 | 0.879 | 0.78 | 0.886 |
| **Cubic polynomial – All** | **0.864** | **0.814** | **0.891** | **0.803** | **0.898** |
| 1-term exponential – PreBD | 0.824 | 0.673 | 0.906 | 0.796 | 0.836 |
| 1-term exponential – PostBD | 0.81 | 0.686 | 0.877 | 0.751 | 0.837 |
| 1-term exponential – All | 0.824 | 0.673 | 0.906 | 0.796 | 0.836 |
| 2-term exponential – PreBD | 0.83 | 0.605 | 0.953 | 0.875 | 0.816 |
| 2-term exponential – PostBD | 0.789 | 0.577 | 0.904 | 0.765 | 0.797 |
| 2-term exponential – All | 0.808 | 0.632 | 0.904 | 0.781 | 0.819 |

PPV: Positive Predictive Value

NPV: Negative Predictive Value

PreBD: Prebronchodilator

PostBD: Postbronchodilator

Highlighted is the highest accuracy system.

Systems that show an accuracy superior to 0.85 are bolded.

**Supplementary Table 2.4. Full diagnostic performance of Support Vector Machines in training sample**

| **Model** | **Accuracy** | **Sensitivity** | **Specificity** | **PPV** | **NPV** |
| --- | --- | --- | --- | --- | --- |
| Quadratic polynomial – PreBD | 0.827 | 0.673 | 0.911 | 0.804 | 0.837 |
| Quadratic polynomial – PostBD | 0.803 | 0.623 | 0.901 | 0.774 | 0.815 |
| Quadratic polynomial – All | 0.821 | 0.641 | 0.919 | 0.81 | 0.825 |
| Cubic polynomial – PreBD | 0.797 | 0.595 | 0.906 | 0.775 | 0.805 |
| Cubic polynomial – PostBD | 0.79 | 0.6 | 0.894 | 0.754 | 0.804 |
| Cubic polynomial – All | 0.81 | 0.623 | 0.911 | 0.792 | 0.816 |
| 1-term exponential – PreBD | 0.821 | 0.659 | 0.909 | 0.797 | 0.831 |
| 1-term exponential – PostBD | 0.802 | 0.595 | 0.914 | 0.789 | 0.806 |
| 1-term exponential – All | 0.821 | 0.659 | 0.909 | 0.797 | 0.831 |
| 2-term exponential – PreBD | 0.648 | 0 | 1 | NaN | 0.648 |
| 2-term exponential – PostBD | 0.648 | 0 | 1 | NaN | 0.648 |
| 2-term exponential – All | 0.595 | 0.059 | 0.886 | 0.22 | 0.634 |

PPV: Positive Predictive Value

NPV: Negative Predictive Value

PreBD: Prebronchodilator

PostBD: Postbronchodilator

NaN: Not a Number. Caused by a division by 0.

Highlighted is the highest accuracy system.

**Supplementary Table 2.5. Full diagnostic performance of Artificial Neural Networks in training sample**

| **Model** | **Accuracy** | **Sensitivity** | **Specificity** | **PPV** | **NPV** |
| --- | --- | --- | --- | --- | --- |
| **Quadratic polynomial – PreBD** | **0.872** | **0.782** | **0.921** | **0.843** | **0.886** |
| **Quadratic polynomial – PostBD** | **0.872** | **0.795** | **0.914** | **0.833** | **0.892** |
| **Quadratic polynomial – All** | **0.898** | **0.823** | **0.938** | **0.879** | **0.907** |
| Cubic polynomial – PreBD | 0.85 | 0.718 | 0.921 | 0.832 | 0.857 |
| **Cubic polynomial – PostBD** | **0.874** | **0.8** | **0.914** | **0.834** | **0.894** |
| **Cubic polynomial – All** | **0.912** | **0.877** | **0.931** | **0.873** | **0.933** |
| 1-term exponential – PreBD | 0.821 | 0.691 | 0.891 | 0.776 | 0.841 |
| 1-term exponential – PostBD | 0.803 | 0.668 | 0.877 | 0.746 | 0.829 |
| 1-term exponential – All | 0.822 | 0.695 | 0.891 | 0.777 | 0.843 |
| 2-term exponential – PreBD | 0.752 | 0.295 | 1 | 1 | 0.723 |
| 2-term exponential – PostBD | 0.738 | 0.277 | 0.988 | 0.924 | 0.716 |
| 2-term exponential – All | 0.725 | 0.236 | 0.99 | 0.929 | 0.705 |

PPV: Positive Predictive Value

NPV: Negative Predictive Value

PreBD: Prebronchodilator

PostBD: Postbronchodilator

Highlighted is the highest accuracy system.

Systems that show an accuracy superior to 0.85 are bolded.

**Supplementary Table 2.6. Full diagnostic accuracy of K-means Clustering in testing sample**

| **Model** | **Accuracy** | **Sensitivity** | **Specificity** | **PPV** | **NPV** |
| --- | --- | --- | --- | --- | --- |
| Quadratic polynomial – PreBD | 0.7 | 0.882 | 0.642 | 0.441 | 0.944 |
| Quadratic polynomial – PostBD | 0.714 | 0.941 | 0.642 | 0.457 | 0.971 |
| Quadratic polynomial – All | 0.729 | 0.941 | 0.66 | 0.471 | 0.972 |
| Cubic polynomial – PreBD | 0.571 | 0.647 | 0.547 | 0.314 | 0.829 |
| Cubic polynomial – PostBD | 0.557 | 0.647 | 0.528 | 0.306 | 0.824 |
| Cubic polynomial – All | 0.543 | 0.647 | 0.509 | 0.297 | 0.818 |
| 1-term exponential – PreBD | 0.743 | 0 | 0.981 | 0 | 0.754 |
| 1-term exponential – PostBD | 0.757 | 0 | 1 | NaN | 0.757 |
| 1-term exponential – All | 0.757 | 0 | 1 | NaN | 0.757 |
| 2-term exponential – PreBD | 0.743 | 0 | 0.981 | 0 | 0.754 |
| 2-term exponential – PostBD | 0.757 | 0 | 1 | NaN | 0.757 |
| 2-term exponential – All | 0.757 | 0 | 1 | NaN | 0.757 |

PPV: Positive Predictive Value

NPV: Negative Predictive Value

PreBD: Prebronchodilator

PostBD: Postbronchodilator

NaN: Not a Number. Caused by a division by 0.

Highlighted is the highest accuracy system.

**Supplementary Table 2.7. Full diagnostic accuracy of Hierarchical Clustering in testing sample**

| **Model** | **Accuracy** | **Sensitivity** | **Specificity** | **PPV** | **NPV** |
| --- | --- | --- | --- | --- | --- |
| Quadratic polynomial – PreBD | 0.757 | 0.824 | 0.736 | 0.5 | 0.929 |
| Quadratic polynomial – PostBD | 0.6 | 0.941 | 0.491 | 0.372 | 0.963 |
| Quadratic polynomial – All | 0.814 | 0.765 | 0.83 | 0.591 | 0.917 |
| Cubic polynomial – PreBD | 0.543 | 0.765 | 0.472 | 0.317 | 0.862 |
| Cubic polynomial – PostBD | 0.557 | 0.706 | 0.509 | 0.316 | 0.844 |
| Cubic polynomial – All | 0.6 | 0.176 | 0.736 | 0.176 | 0.736 |
| 1-term exponential – PreBD | 0.557 | 1 | 0.415 | 0.354 | 1 |
| 1-term exponential – PostBD | 0.543 | 0 | 0.717 | 0 | 0.691 |
| 1-term exponential – All | 0.529 | 1 | 0.377 | 0.34 | 1 |
| 2-term exponential – PreBD | 0.729 | 0 | 0.962 | 0 | 0.75 |
| 2-term exponential – PostBD | 0.757 | 0 | 1 | NaN | 0.757 |
| 2-term exponential – All | 0.757 | 0 | 1 | NaN | 0.757 |

PPV: Positive Predictive Value

NPV: Negative Predictive Value

PreBD: Prebronchodilator

PostBD: Postbronchodilator

NaN: Not a Number. Caused by a division by 0.

Highlighted is the highest accuracy system.

**Supplementary Table 2.8. Full diagnostic accuracy of Decision Trees in testing sample**

| **Model** | **Accuracy** | **Sensitivity** | **Specificity** | **PPV** | **NPV** |
| --- | --- | --- | --- | --- | --- |
| **Quadratic polynomial – PreBD** | **0.886** | **0.647** | **0.962** | **0.846** | **0.895** |
| **Quadratic polynomial – PostBD** | **0.871** | **0.824** | **0.887** | **0.7** | **0.94** |
| Quadratic polynomial – All | 0.829 | 0.824 | 0.83 | 0.609 | 0.936 |
| Cubic polynomial – PreBD | 0.843 | 0.647 | 0.906 | 0.688 | 0.889 |
| Cubic polynomial – PostBD | 0.814 | 0.765 | 0.83 | 0.591 | 0.917 |
| Cubic polynomial – All | 0.843 | 0.824 | 0.849 | 0.636 | 0.938 |
| **1-term exponential – PreBD** | **0.857** | **0.706** | **0.906** | **0.706** | **0.906** |
| 1-term exponential – PostBD | 0.843 | 0.706 | 0.887 | 0.667 | 0.904 |
| **1-term exponential – All** | **0.857** | **0.706** | **0.906** | **0.706** | **0.906** |
| 2-term exponential – PreBD | 0.829 | 0.529 | 0.925 | 0.692 | 0.86 |
| 2-term exponential – PostBD | 0.8 | 0.529 | 0.887 | 0.6 | 0.855 |
| 2-term exponential – All | 0.743 | 0.471 | 0.83 | 0.471 | 0.83 |

PPV: Positive Predictive Value

NPV: Negative Predictive Value

PreBD: Prebronchodilator

PostBD: Postbronchodilator

Highlighted is the highest accuracy system.

Systems that show an accuracy superior to 0.85 are bolded.

**Supplementary Table 2.9. Full diagnostic accuracy of Support Vector Machines in testing sample**

| **Model** | **Accuracy** | **Sensitivity** | **Specificity** | **PPV** | **NPV** |
| --- | --- | --- | --- | --- | --- |
| **Quadratic polynomial – PreBD** | **0.857** | **0.706** | **0.906** | **0.706** | **0.906** |
| **Quadratic polynomial – PostBD** | **0.857** | **0.706** | **0.906** | **0.706** | **0.906** |
| **Quadratic polynomial – All** | **0.886** | **0.706** | **0.943** | **0.8** | **0.909** |
| **Cubic polynomial – PreBD** | **0.857** | **0.765** | **0.887** | **0.684** | **0.922** |
| **Cubic polynomial – PostBD** | **0.857** | **0.647** | **0.925** | **0.733** | **0.891** |
| **Cubic polynomial – All** | **0.886** | **0.765** | **0.925** | **0.765** | **0.925** |
| **1-term exponential – PreBD** | **0.886** | **0.706** | **0.943** | **0.8** | **0.909** |
| **1-term exponential – PostBD** | **0.857** | **0.647** | **0.925** | **0.733** | **0.891** |
| **1-term exponential – All** | **0.886** | **0.706** | **0.943** | **0.8** | **0.909** |
| 2-term exponential – PreBD | 0.757 | 0 | 1 | NaN | 0.757 |
| 2-term exponential – PostBD | 0.757 | 0 | 1 | NaN | 0.757 |
| 2-term exponential – All | 0.714 | 0.118 | 0.906 | 0.286 | 0.762 |

PPV: Positive Predictive Value

NPV: Negative Predictive Value

PreBD: Prebronchodilator

PostBD: Postbronchodilator

NaN: Not a Number. Caused by a division by 0.

Highlighted is the highest accuracy system.

Systems that show an accuracy superior to 0.85 are bolded.

**Supplementary Table 2.10. Full diagnostic accuracy of Artificial Neural Networks in testing sample**

| **Model** | **Accuracy** | **Sensitivity** | **Specificity** | **PPV** | **NPV** |
| --- | --- | --- | --- | --- | --- |
| **Quadratic polynomial – PreBD** | **0.871** | **0.765** | **0.906** | **0.722** | **0.923** |
| **Quadratic polynomial – PostBD** | **0.929** | **0.882** | **0.943** | **0.833** | **0.962** |
| **Quadratic polynomial – All** | **0.914** | **0.824** | **0.943** | **0.824** | **0.943** |
| **Cubic polynomial – PreBD** | **0.9** | **0.824** | **0.925** | **0.778** | **0.942** |
| **Cubic polynomial – PostBD** | **0.9** | **0.824** | **0.925** | **0.778** | **0.942** |
| **Cubic polynomial – All** | **0.871** | **0.882** | **0.868** | **0.682** | **0.958** |
| **1-term exponential – PreBD** | **0.871** | **0.706** | **0.925** | **0.75** | **0.907** |
| **1-term exponential – PostBD** | **0.857** | **0.706** | **0.906** | **0.706** | **0.906** |
| **1-term exponential – All** | **0.871** | **0.706** | **0.925** | **0.75** | **0.907** |
| 2-term exponential – PreBD | 0.829 | 0.412 | 0.962 | 0.778 | 0.836 |
| 2-term exponential – PostBD | 0.829 | 0.294 | 1 | 1 | 0.815 |
| 2-term exponential – All | 0.786 | 0.235 | 0.962 | 0.667 | 0.797 |

PPV: Positive Predictive Value

NPV: Negative Predictive Value

PreBD: Prebronchodilator

PostBD: Postbronchodilator

Highlighted is the highest accuracy system.

Systems that show an accuracy superior to 0.85 are bolded.
